# Supplementary material for: Highly Sensitive Electrochemical Biosensor Using Folic Acid-Modified Reduced Graphene Oxide for the Detection of Cancer Biomarker
Source: MDPI journal article supplement (doi:10.3390/nano11051272), 2021-05-12
Supplement: s1 [file s1]

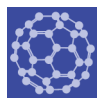

## Supplementary Information

# Highly Sensitive Electrochemical Biosensor Using Folic Acid-Modified Reduced Graphene Oxide for the Detection of Cancer Biomarker

Renu Geetha Bai <sup>1,2</sup>, Kasturi Muthoosamy <sup>1</sup>, Rando Tuvikene <sup>2</sup>, Huang Nay Ming <sup>3</sup> and Sivakumar Manickam <sup>1,4,\*</sup>

<sup>1</sup>Nanotechnology Research Group, Department of Chemical and Environmental Engineering, Faculty of Engineering, University of Nottingham Malaysia, 43500 Semenyih, Selangor, Malaysia; rgeetha@tlu.ee (R.G.B.); Kasturi.Muthoosamy@nottingham.edu.my (K.M.)

<sup>2</sup>School of Natural Sciences and Health, Tallinn University, 10120 Tallinn, Estonia; rantuv@tlu.ee

<sup>3</sup>School of Energy and Chemical Engineering, New Energy Science & Engineering, Xiamen University Malaysia, 43900 Sepang, Malaysia; huangnayming@xmu.edu.my

<sup>4</sup>Petroleum and Chemical Engineering, Faculty of Engineering, Universiti Teknologi Brunei, Bandar Seri Begawan BE1410, Brunei

\* Correspondence: manickam.sivakumar@utb.edu.bn

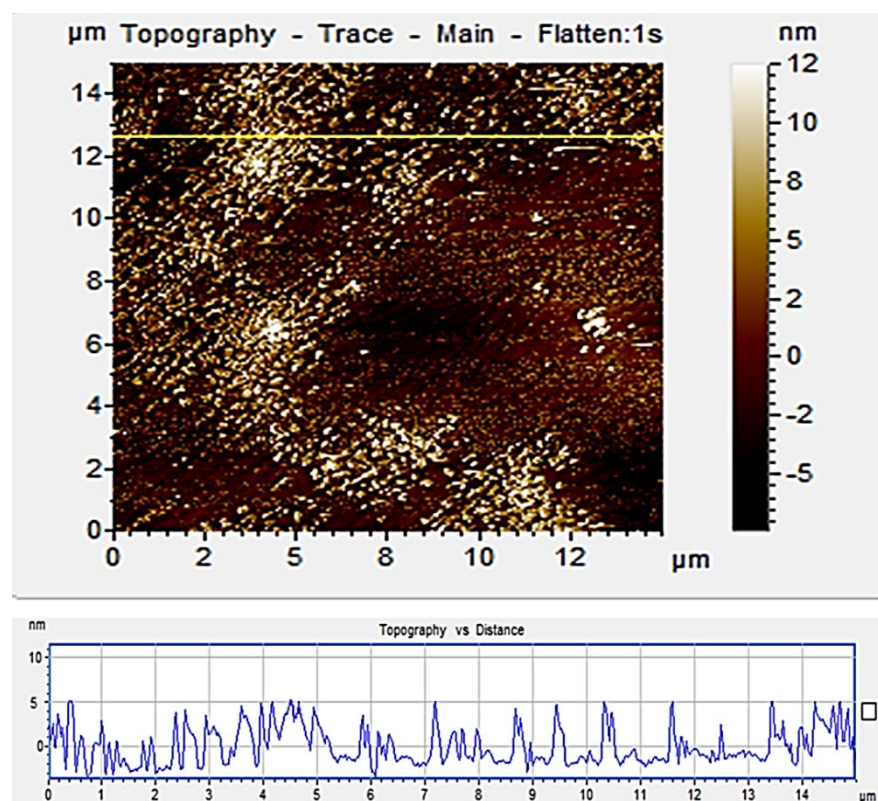

**Figure S1.** AFM image of RGO-FA and the height profile at cross-section with average thickness as 5 nm.

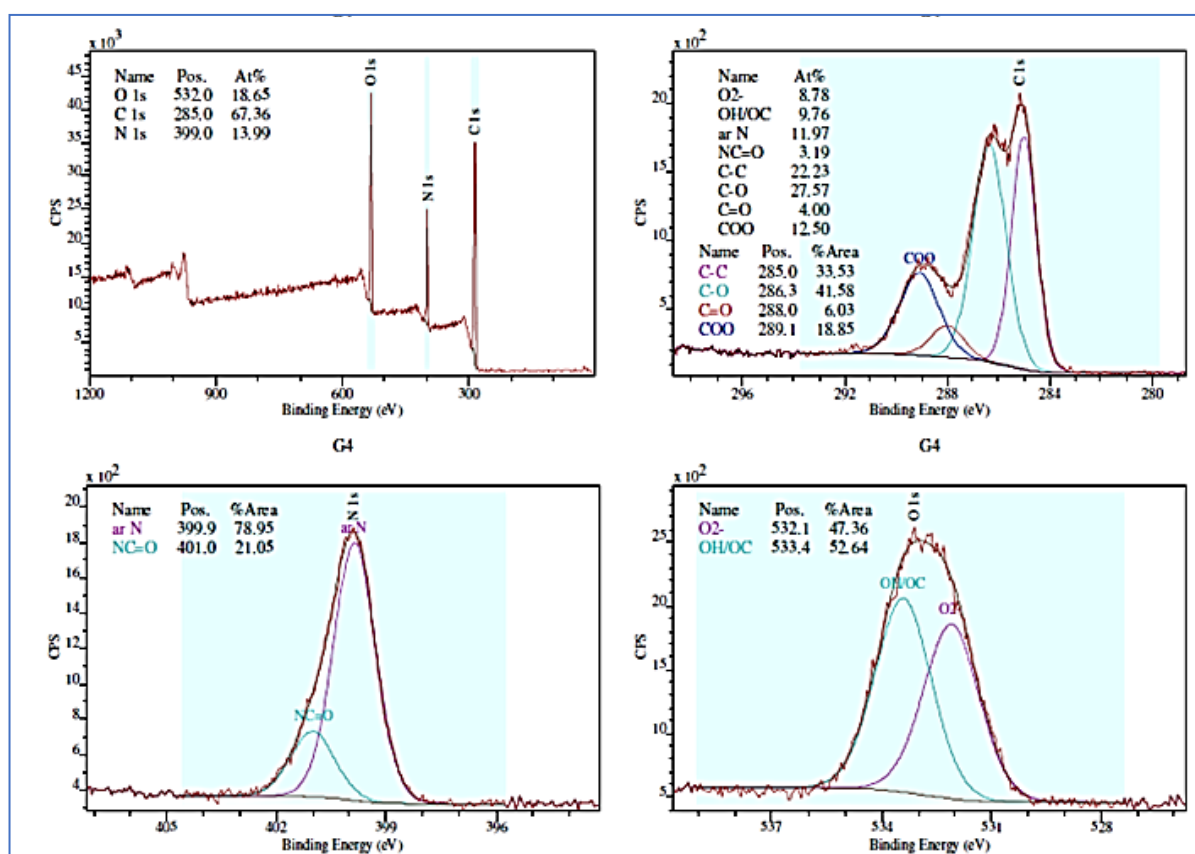

**Figure S2.** XPS analysis of RGO-FA, displaying various bonds supporting the conjugation of RGO and FA and elemental analysis as an atomic percentage.

**Table S1.** FTIR peaks of FA and its corresponding functional groups [1]

| Wavenumber (cm <sup>-1</sup> ) | Functional group                                           |
|--------------------------------|------------------------------------------------------------|
| 1485–1519                      | Phenyl and Pterin ring                                     |
| 1604                           | NH bending                                                 |
| 1619                           | C=C aromatic                                               |
| 1639                           | C=N                                                        |
| 1650                           | C=O amide                                                  |
| 1693                           | C=O carboxylic                                             |
| 3100–3500                      | OH carboxylic functional group of the glutamic acid moiety |

#### Reference

1. Mohammed, E.M.K.A.D. Qualitative and quantitative determination of folic acid in tablets by FTIR spectroscopy. *Int. J. Adv. Pharm. Biol. Chem.* **2014**, *3*, 773–780.
